# Supplementary material for: Structural basis for PtdInsP2-mediated human TRPML1 regulation
Source: PubMed Central journal article supplement (PMC6180102; doi:10.1038/s41467-018-06493-7), 2018-10-10
Supplement: 41467_2018_6493_MOESM1_ESM.pdf [file 41467_2018_6493_MOESM1_ESM.pdf]

## **Supplementary Information**

### **Structural basis for PtdInsP<sub>2</sub>-mediated human TRPML1 regulation**

**Michael Fine, Philip Schmiede, and Xiaochun Li**

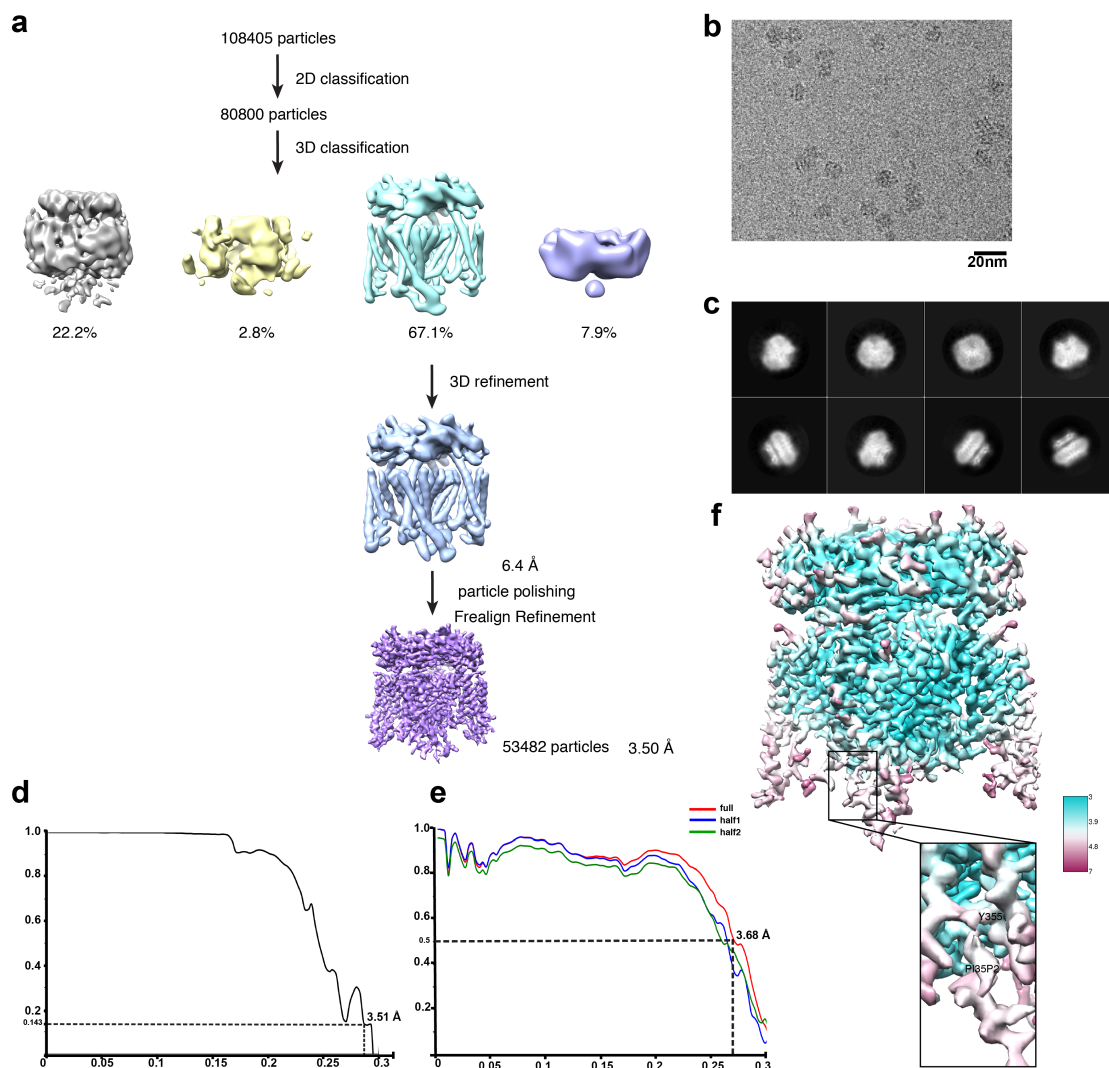

**Supplementary Fig. 1 Data processing and model quality assessment of PtdIns(3,5)P<sub>2</sub> bound TRPML1.**

**a**, The data processing work-flow for PtdIns(3,5)P<sub>2</sub> bound TRPML1. **b**, A representative electron micrograph at defocus -2.0 μm. **c**, 2D classification. **d**, Fourier shell correlation (FSC) curve of the structure with FSC as a function of resolution using Frealign output. **e**, The FSC curves calculated between the refined structure and the half map used for refinement, the other half map, and the full map. **f**, Density map of PtdIns(3,5)P<sub>2</sub> bound TRPML1 structure colored by local resolution estimation using blocres.

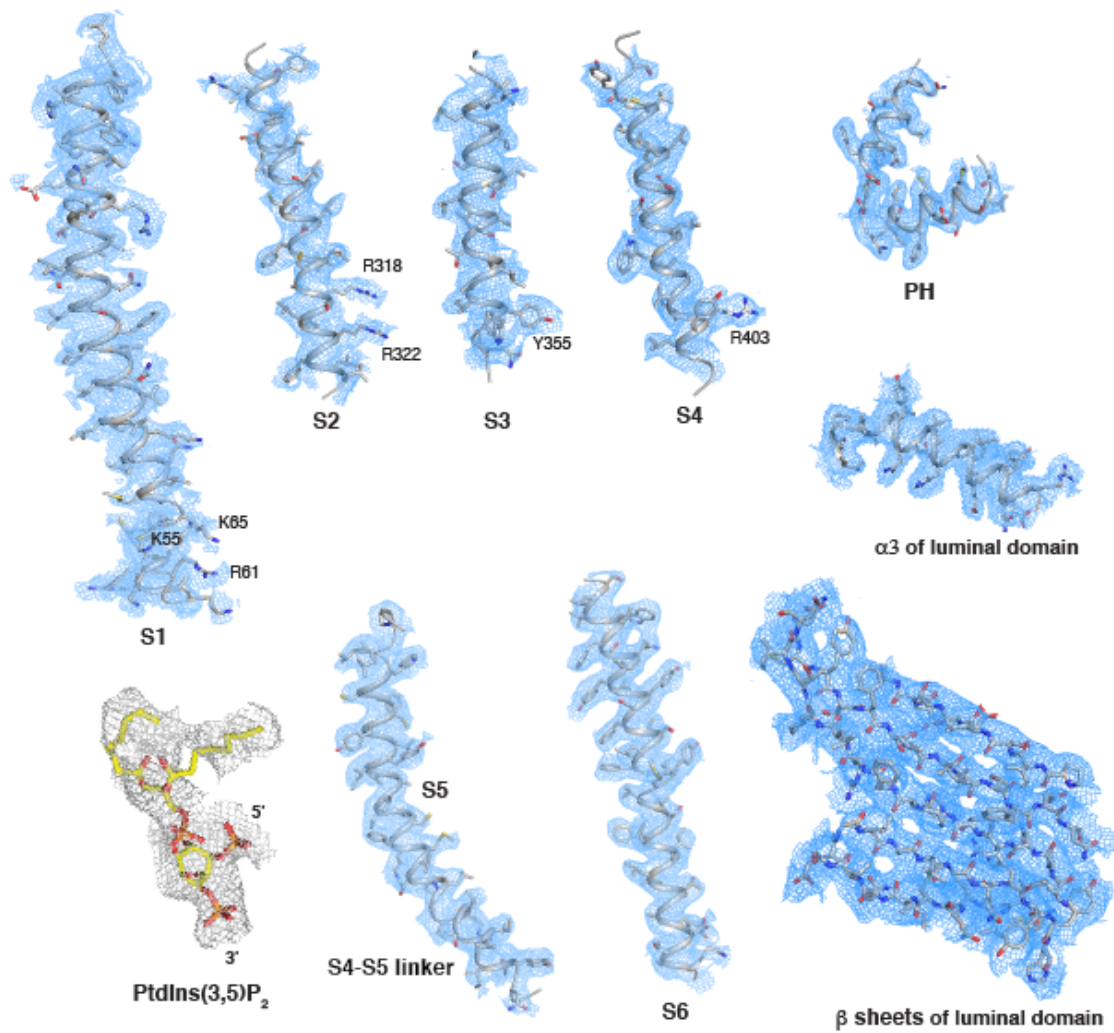

**Supplementary Fig. 2 Electron microscopy density of different portions of PtdIns(3,5)P<sub>2</sub> bound TRPML1 at 5 $\sigma$  level.**

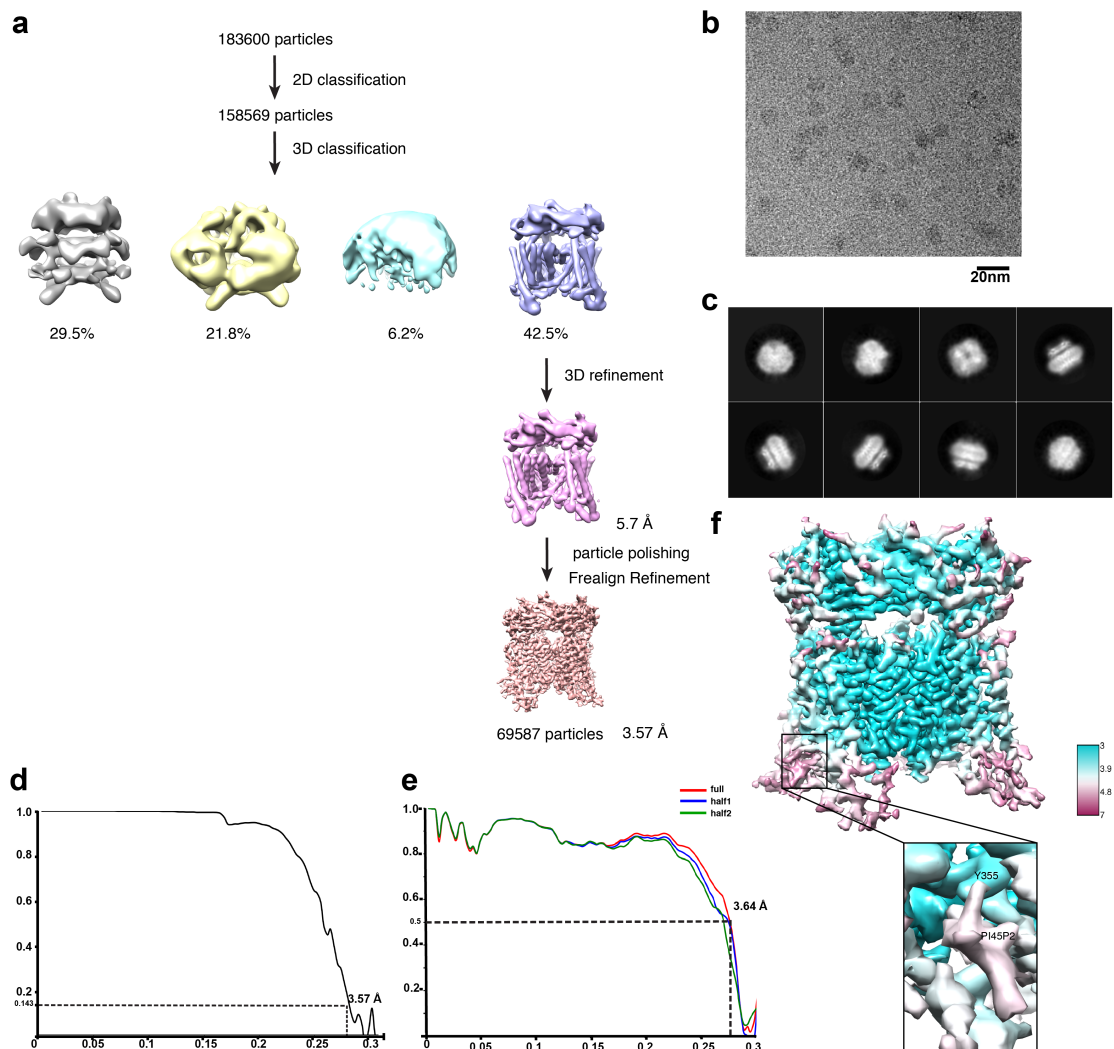

**Supplementary Fig. 3 Data processing and model quality assessment of PtdIns(4,5)P<sub>2</sub> bound TRPML1.**

**a**, The data processing work-flow for PtdIns(4,5)P<sub>2</sub> bound TRPML1. **b**, A representative electron micrograph at defocus -2.0 μm. **c**, 2D classification. **d**, Fourier shell correlation (FSC) curve of the structure with FSC as a function of resolution using FREALIGN output. **e**, The FSC curves calculated between the refined structure and the half map used for refinement, the other half map, and the full map. **f**, Density map of PtdIns(4,5)P<sub>2</sub> bound TRPML1 structure colored by local resolution estimation using blocres.

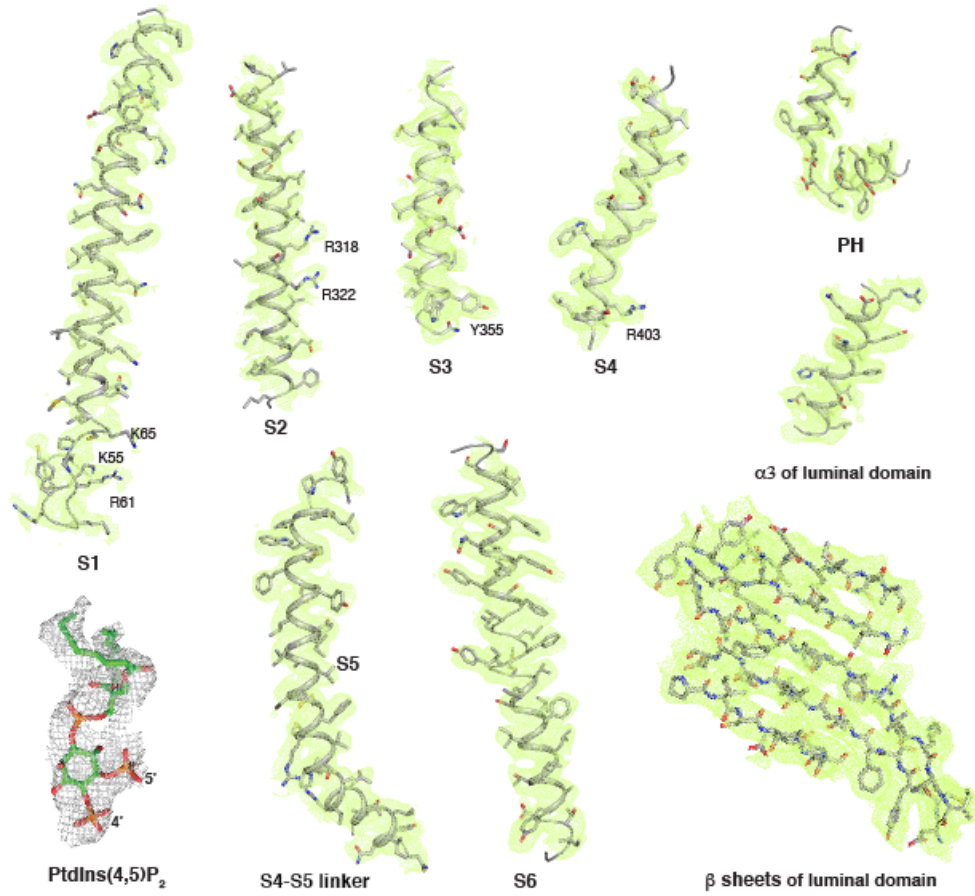

**Supplementary Fig. 4 Electron microscopy density of different portions of PtdIns(4,5)P<sub>2</sub> bound TRPML1 at 5σ level.**

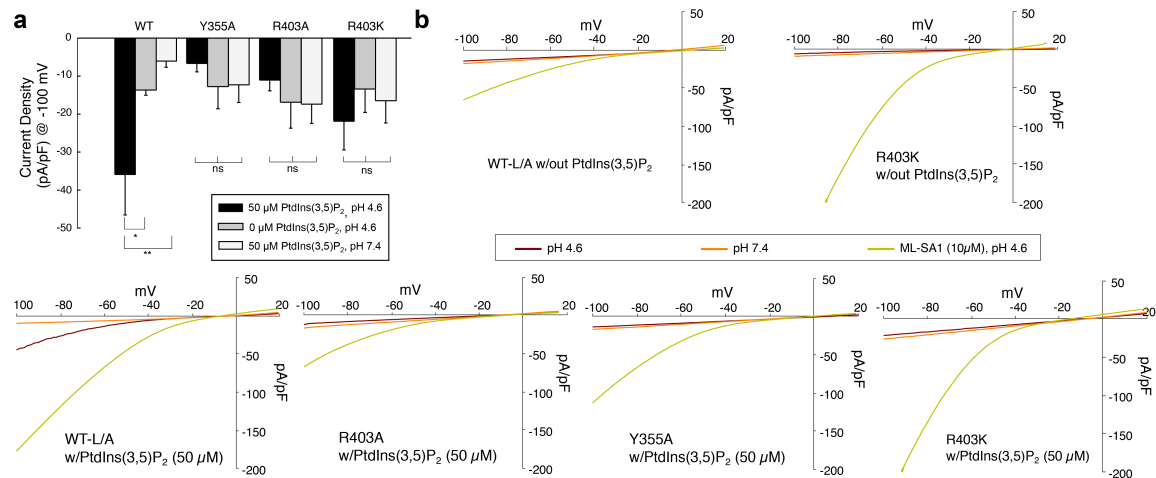

**Supplementary Fig. 5 Validation and representative current-voltage relationships of TRPML1 inositide binding mutants**

**a**, Current densities at -100 mV for various TRPML1 constructs with or without 50  $\mu\text{M}$  PtdIns(3,5)P<sub>2</sub> at pH 4.6 and 7.4 reveal significant stimulation for WT at low pH as previously published but not the inositide pore binding mutants Y355A, R403A and R403K when 50  $\mu\text{M}$  PtdIns(3,5)P<sub>2</sub> is present in the pipette solution. ( $p^*=0.038$ ,  $p^{**}=0.001$ ); ( $n=8, 7, 8, 5, 5, 5, 4, 4, 4, 11, 6, 11$ , resp.). Values are mean  $\pm$  s.e.m. **b**, Representative current voltage relationships of TRPML1 WT-L/A and inositide binding mutants.

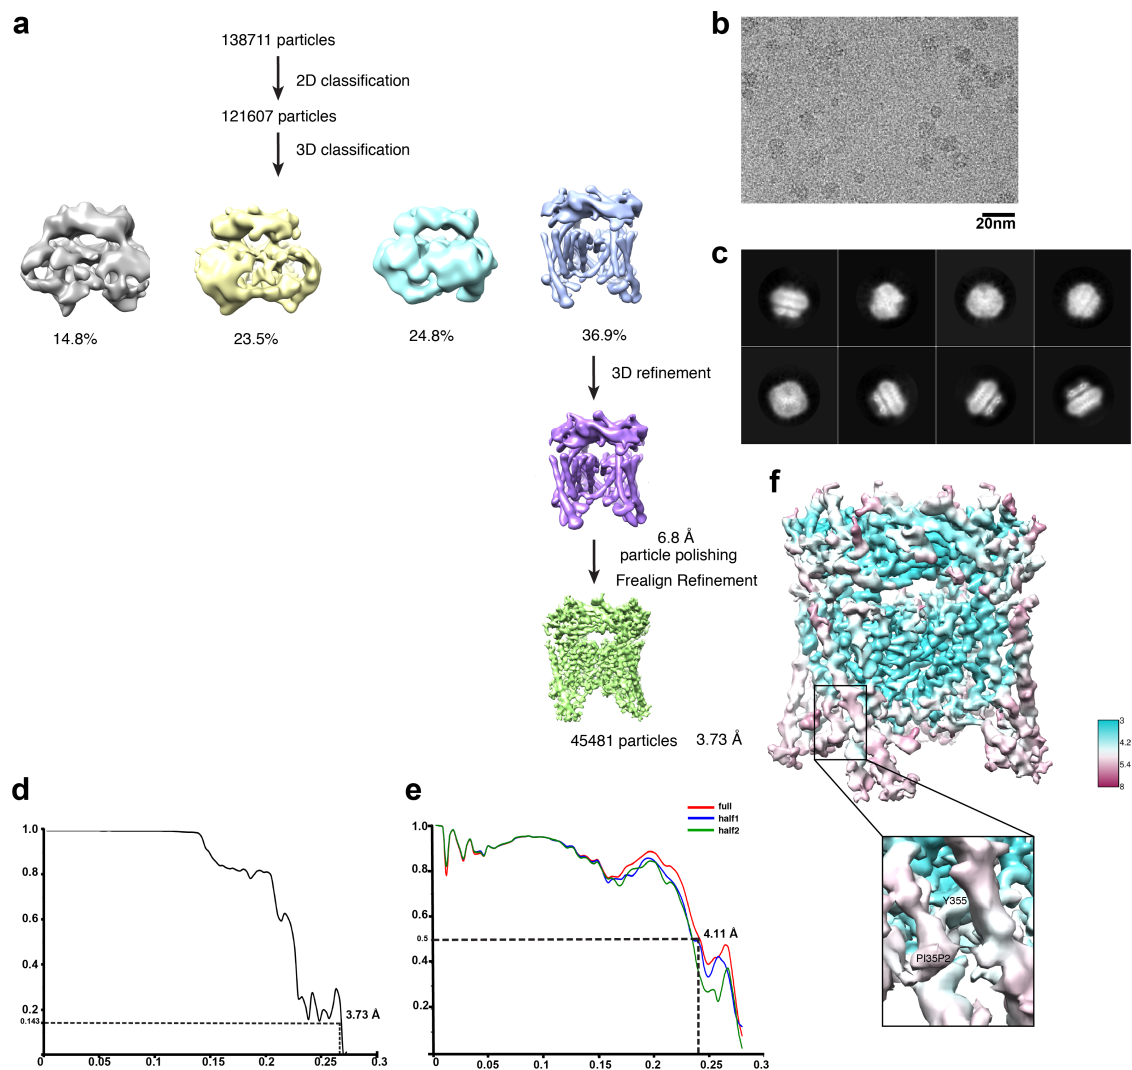

**Supplementary Fig. 6 Data processing and model quality assessment of PtdIns(3,5)P<sub>2</sub>/ML-SA1 bound TRPML1.**

**a**, The data processing work-flow for PtdIns(3,5)P<sub>2</sub>/ML-SA1 bound TRPML1. **b**, A representative electron micrograph at defocus -2.0 μm. **c**, 2D classification. **d**, Fourier shell correlation (FSC) curve of the structure with FSC as a function of resolution using Frealign output. **e**, The FSC curves calculated between the refined structure and the half map used for refinement, the other half map, and the full map. **f**, Density map of PtdIns(3,5)P<sub>2</sub>/ML-SA1 bound TRPML1 structure colored by local resolution estimation using blocres.

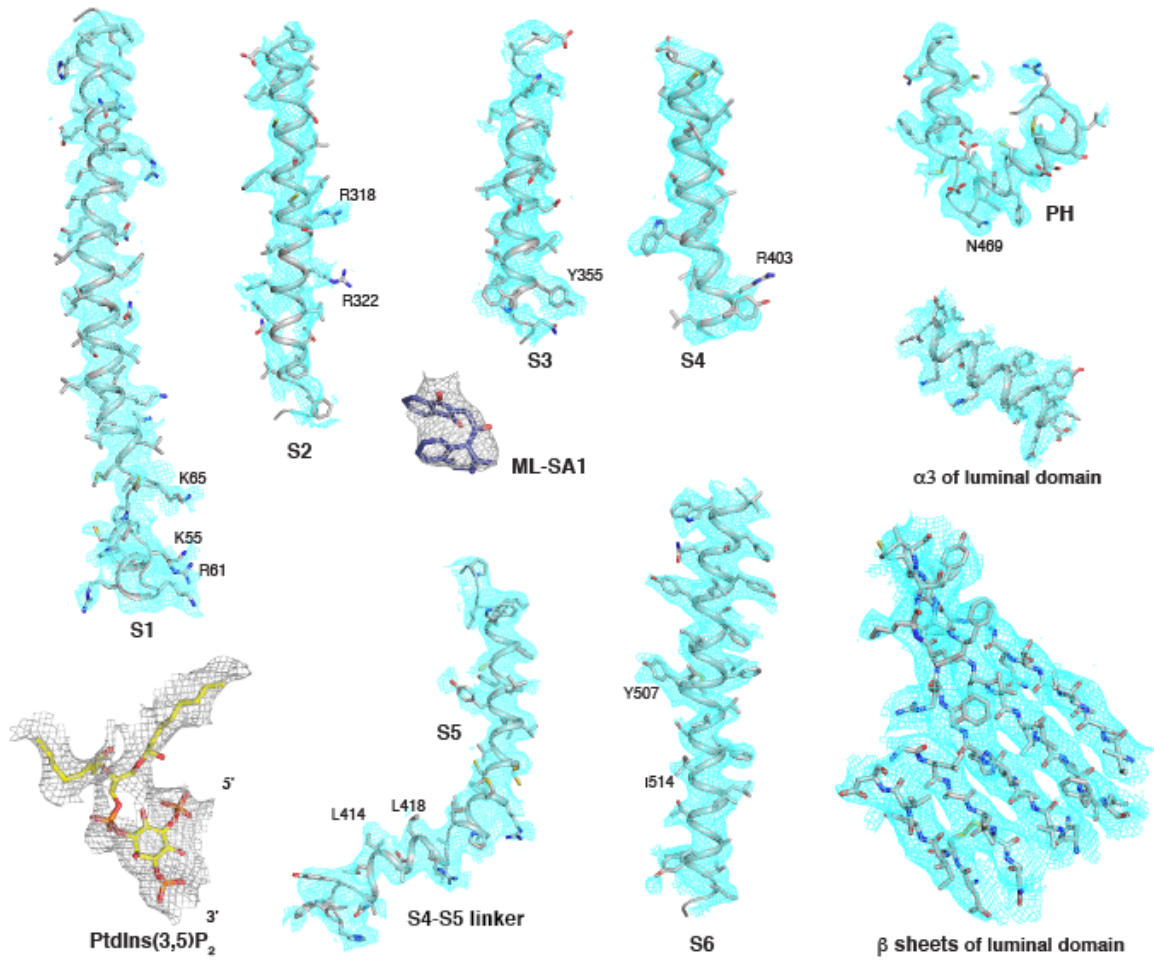

**Supplementary Fig. 7 Electron microscopy density of different portions of PtdIns(3,5)P<sub>2</sub>/ML-SA1 bound TRPML1 at 5 $\sigma$  level.**



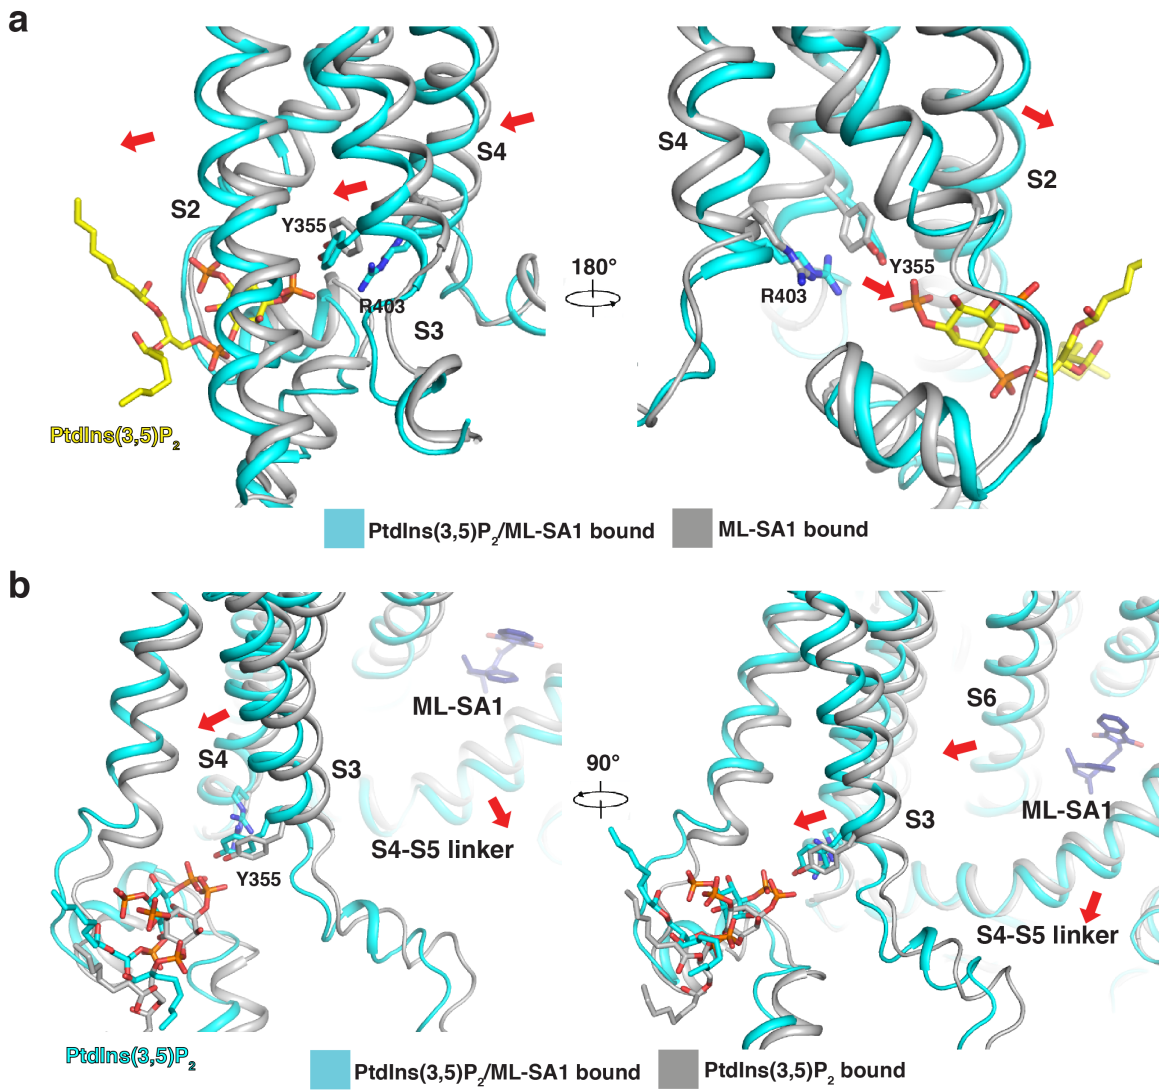

**Supplementary Fig. 8 Structural comparison of PtdIns(3,5)P<sub>2</sub>/ML-SA1 bound with ML-SA1 bound TRPML1 or PtdIns(3,5)P<sub>2</sub> bound TRPML1.**

**a**, PtdIns(3,5)P<sub>2</sub>/ML-SA1 bound TRPML1 is shown in cyan, with PtdIns(3,5)P<sub>2</sub> in yellow sticks. ML-SA1 bound TRPML1 is in gray with structural shifts indicated by red arrows.

**b**, PtdIns(3,5)P<sub>2</sub>/ML-SA1 bound TRPML1 is shown in cyan, with PtdIns(3,5)P<sub>2</sub> in cyan sticks. PtdIns(3,5)P<sub>2</sub> bound TRPML1 is in gray, with PtdIns(3,5)P<sub>2</sub> in gray sticks. The structural shifts indicated by red arrows.

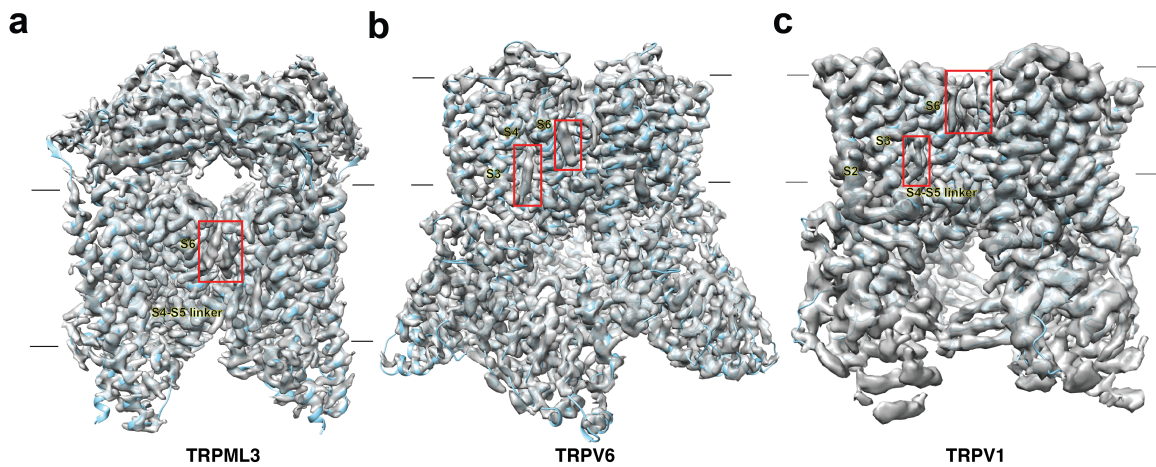

**Supplementary Fig. 9 Lipid-bound sites of TRP channels.**

**a**, cryo-EM map and structure of TRPML3 (EMD-8764 and PDB:5W3S). **b**, cryo-EM map and structure of TRPV6 (EMD-7120 and PDB:6BO8). **c**, cryo-EM map and structure of TRPV1 (EMD-8118 and PDB:5IRZ). The lipid-bound sites are indicated by red frames and the related structural elements are labeled.

**Supplementary Table. 1 Cryo-EM data collection, refinement and validation statistics**

|                                                  | PI(3,5)P2-bound<br>(EMDB-9000)<br>(PDB 6E7P) | PI(4,5)P2-bound<br>(EMDB-9001)<br>(PDB 6E7Y) | PI(3,5)P2/ML-SA1-bound<br>(EMDB-9002)<br>(PDB 6E7Z) |
|--------------------------------------------------|----------------------------------------------|----------------------------------------------|-----------------------------------------------------|
| <b>Data collection and processing</b>            |                                              |                                              |                                                     |
| Magnification                                    | 46730                                        | 46730                                        | 46730                                               |
| Voltage (kV)                                     | 300                                          | 300                                          | 300                                                 |
| Electron exposure (e-/Å <sup>2</sup> )           | 84                                           | 84                                           | 84                                                  |
| Defocus range (µm)                               | -1.2 to -2.5                                 | -0.8 to -2.3                                 | -0.8 to -2.7                                        |
| Pixel size (Å)                                   | 1.07                                         | 1.07                                         | 1.07                                                |
| Symmetry imposed                                 | C4                                           | C4                                           | C4                                                  |
| Initial particle images (no.)                    | 108405                                       | 183600                                       | 138711                                              |
| Final particle images (no.)                      | 53482                                        | 69587                                        | 45481                                               |
| Map resolution (Å)                               | 3.51                                         | 3.57                                         | 3.73                                                |
| FSC threshold                                    | 0.143                                        | 0.143                                        | 0.143                                               |
| Map resolution range (Å)                         | 3.51-256                                     | 3.57-256                                     | 3.73-256                                            |
| <b>Refinement</b>                                |                                              |                                              |                                                     |
| Initial model used (PDB code)                    | 5WJ5                                         | 5WJ5                                         | 5WJ5                                                |
| Model resolution (Å)                             | 3.51                                         | 3.57                                         | 3.73                                                |
| FSC threshold                                    | 0.143                                        | 0.143                                        | 0.143                                               |
| Model resolution range (Å)                       | 3.51-256                                     | 3.57-256                                     | 3.73-256                                            |
| Map sharpening <i>B</i> factor (Å <sup>2</sup> ) | -100                                         | -100                                         | -100                                                |
| Model composition                                |                                              |                                              |                                                     |
| Non-hydrogen atoms                               | 15508                                        | 15508                                        | 15616                                               |
| Protein residues                                 | 1900                                         | 1900                                         | 1900                                                |
| Ligands                                          | 4                                            | 4                                            | 8                                                   |
| <i>B</i> factors (Å <sup>2</sup> )               |                                              |                                              |                                                     |
| Protein                                          | 102.42                                       | 51.37                                        | 106.27                                              |
| Ligand                                           | 143.62                                       | 109.59                                       | 124.88                                              |
| R.m.s. deviations                                |                                              |                                              |                                                     |
| Bond lengths (Å)                                 | 0.0110                                       | 0.0044                                       | 0.0103                                              |
| Bond angles (°)                                  | 1.29                                         | 1.14                                         | 1.26                                                |
| Validation                                       |                                              |                                              |                                                     |
| MolProbity score                                 | 3.62                                         | 2.1                                          | 4.96                                                |
| Clashscore                                       | 1.65                                         | 1.43                                         | 1.83                                                |
| Poor rotamers (%)                                | 0.24                                         | 0                                            | 0                                                   |
| Ramachandran plot                                |                                              |                                              |                                                     |
| Favored (%)                                      | 91.8                                         | 92.9                                         | 89.2                                                |
| Allowed (%)                                      | 8.0                                          | 7.1                                          | 10.8                                                |
| Disallowed (%)                                   | 0.2                                          | 0                                            | 0                                                   |

## Supplementary Table. 2 Primer sequences

| <b>Primer Name</b> | <b>Primer Sequence</b>                              |
|--------------------|-----------------------------------------------------|
| Y355A 5'           | TTT GTC AAT GGC TGG GCC ATC CTG CTC GTC ACC         |
| Y355A 3'           | GGT GAC GAG CAG GAT GGC CCA GCC ATT GAC AAA         |
| R403A 5'           | GTG TGG GTG GGC GTG ATC GCA TAC CTG ACC TTC TTC CAC |
| R403A 3'           | GTG GAA GAA GGT CAG GTA TGC GAT CAC GCC CAC CCA CAC |
| R403K 5'           | GTG TGG GTG GGC GTG ATC AAA TAC CTG ACC TTC TTC CAC |
| R403K 3'           | GTG GAA GAA GGT CAG GTA TTT GAT CAC GCC CAC CCA CAC |
